# Supplementary material for: Clinical relevance of false-negative interferon-gamma release assays in patients with tuberculous pleurisy in an intermediate tuberculosis burden country
Source: PubMed Central journal article supplement — J Thorac Dis. 2022 Apr;14(4):1009–19. doi: 10.21037/jtd-21-1723 (PMC9096317; doi:10.21037/jtd-21-1723), 2022-04
Supplement: jtd-14-04-1009-dss.pdf [file jtd-14-04-1009-dss.pdf]

## Data Sharing Statement

|                     |                                                                                                                                                    |                                                                                                                                                                                                                                                                              |
|---------------------|----------------------------------------------------------------------------------------------------------------------------------------------------|------------------------------------------------------------------------------------------------------------------------------------------------------------------------------------------------------------------------------------------------------------------------------|
| <b>Article Info</b> | <a href="https://dx.doi.org/10.21037/jtd-21-1723">https://dx.doi.org/10.21037/jtd-21-1723</a>                                                      |                                                                                                                                                                                                                                                                              |
| <b>Item</b>         | <b>Question</b>                                                                                                                                    | <b>Authors' Response<br/>(place "-" if not applicable)</b>                                                                                                                                                                                                                   |
| 1                   | Would you like to share data collected for your study to others?                                                                                   | No                                                                                                                                                                                                                                                                           |
| 2                   | If not, would you like to share the reason for your decision?                                                                                      | Unfortunately, when we submitted a document related with this study to our IRB, we did not comment data sharing of medical records of the enrolled patients. So the data sharing was not approved by our IRB, it seems not to be possible for us to give the data to others. |
| 3                   | What data in particular will be shared?                                                                                                            | -                                                                                                                                                                                                                                                                            |
| 4                   | Any other documents will be share? Such as study protocol, statistical analysis plan, informed consent form, clinical study report, analytic code. | -                                                                                                                                                                                                                                                                            |
| 5                   | When will data availability begin?                                                                                                                 | -                                                                                                                                                                                                                                                                            |
| 6                   | When will data availability end?                                                                                                                   | -                                                                                                                                                                                                                                                                            |
| 7                   | To whom will you share the data?                                                                                                                   | -                                                                                                                                                                                                                                                                            |
| 8                   | For what type of analysis or purpose?                                                                                                              | -                                                                                                                                                                                                                                                                            |
| 9                   | How or where can the data/documents be obtained?                                                                                                   | -                                                                                                                                                                                                                                                                            |
| 10                  | Any other restrictions?                                                                                                                            | -                                                                                                                                                                                                                                                                            |
